# Supplementary material for: Co-Precipitation Synthesis and Optical Properties of Mn4+-Doped Hexafluoroaluminate w-LED Phosphors
Source: Materials (Basel). 2017 Nov 17;10(11):1322. doi: 10.3390/ma10111322 (PMC5706269; doi:10.3390/ma10111322)
Supplement: Supplementary file 1 [file materials-10-01322-s001.zip › materials-234019-Supplementary Materials.pdf]

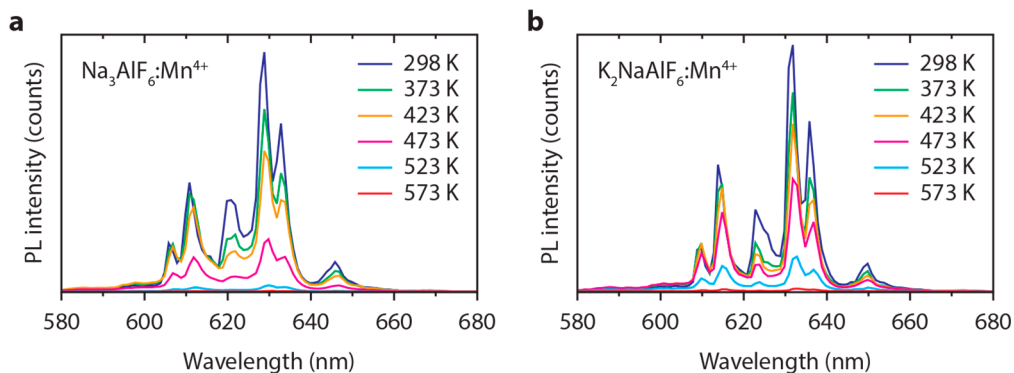

**Figure S1.** Emission spectra of (a)  $\text{Na}_3\text{AlF}_6:\text{Mn}^{4+}$  (0.4%) and (b)  $\text{K}_2\text{NaAlF}_6:\text{Mn}^{4+}$  (0.9%) at various temperatures between 298 and 573 K ( $\lambda_{\text{exc}} = 450$  nm).

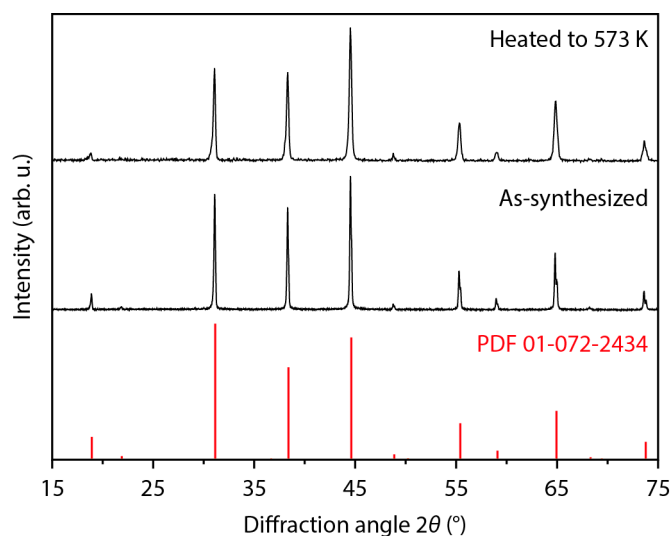

**Figure S2.** XRD patterns of  $\text{K}_2\text{NaAlF}_6:\text{Mn}^{4+}$  (2.9%) for as-synthesized  $\text{K}_2\text{NaAlF}_6:\text{Mn}^{4+}$  phosphor and  $\text{K}_2\text{NaAlF}_6:\text{Mn}^{4+}$  phosphor that has been heated to 573 K. The XRD patterns are in agreement with the reference diffraction pattern for  $\text{K}_2\text{NaAlF}_6$  (PDF 01-072-2434, red).

**Video S1.** Movie of synthesis of  $\text{K}_2\text{NaAlF}_6:\text{Mn}^{4+}$  phosphor. The phosphor shows bright red  $\text{Mn}^{4+}$  luminescence under 405 nm illumination.
